# Supplementary material
Source: PubMed Central journal article supplement (PMC4803517)

1 Table of Content (TOC) Graphic

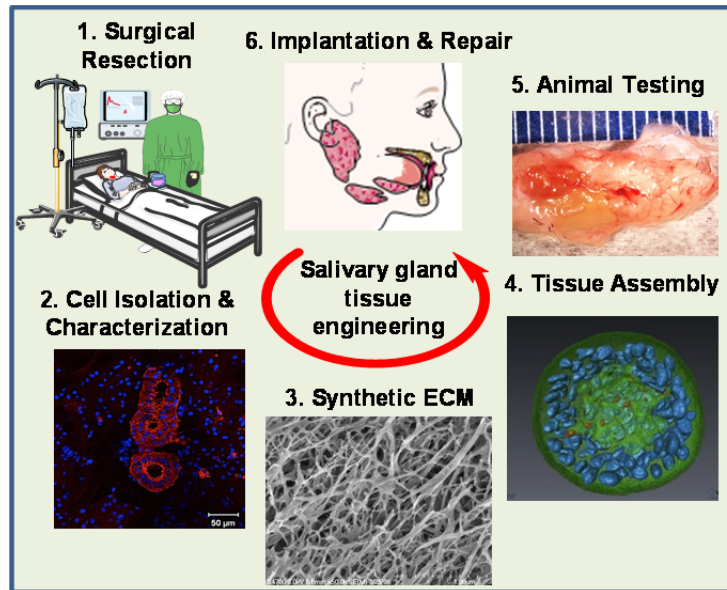

- 2
- 3
- 4

Supplement: NIHMS760466-supplement-Graphical_Abstract.pdf [file NIHMS760466-supplement-Graphical_Abstract.pdf]
